# Supplementary material
Source: publisher site journal article supplement (https://www.dovepress.com/article/252295)
Supplement: Supplementary file 1 [file get_supplementary_file.php]

**Supplementary Figure 1**


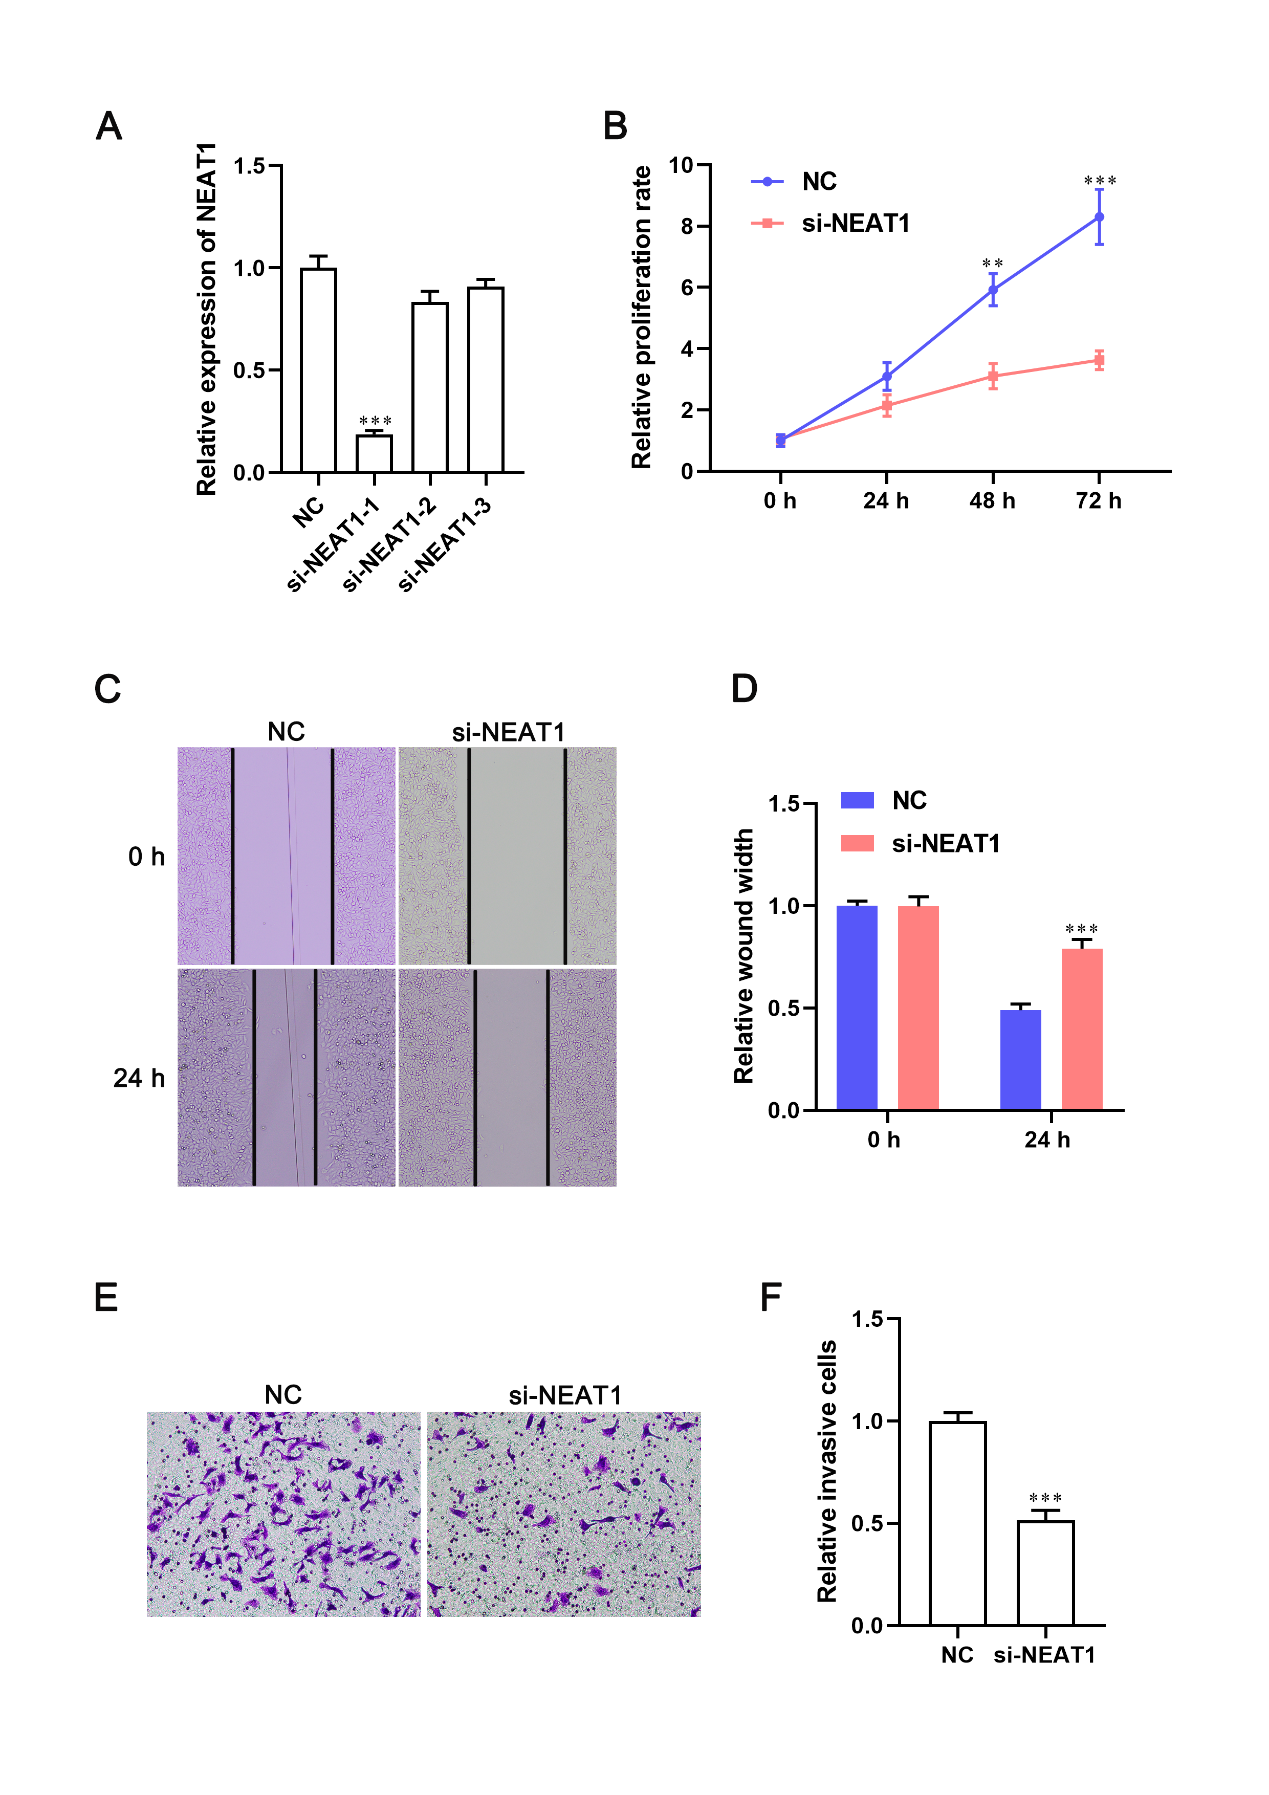


**Supplementary Figure 1.** Silencing of expression of lncRNA NEAT1 inhibits the proliferation, migration, and invasion of MDA-MB-453 cells. The latter were transfected with lncRNA NEAT1 siRNA or negative control (NC) siRNA. (A) Expression of lncRNA NEAT1 in cells was determined by qRT-PCR. (B) Effect of lncRNA NEAT1 on proliferation of MDA-MB-453 cells was determined by the CCK-8 assay. (C and D) A wound-healing assay was used to detect migration of MDA-MB-453 cells. (C) Representative images of wound width and (D) quantification of cell migration. (E and F) Invasion capacity of cells was detected by the Transwell™ assay. (E) Representative images and (F) quantification of invasive cells after the indicated transfections. Data are the mean ± SD, n = 3. ***P* < 0.01, and ****P* < 0.001 compared with NC siRNA groups.
